# THE AMERICAN JOURNAL OF PSYCHIATRY

---

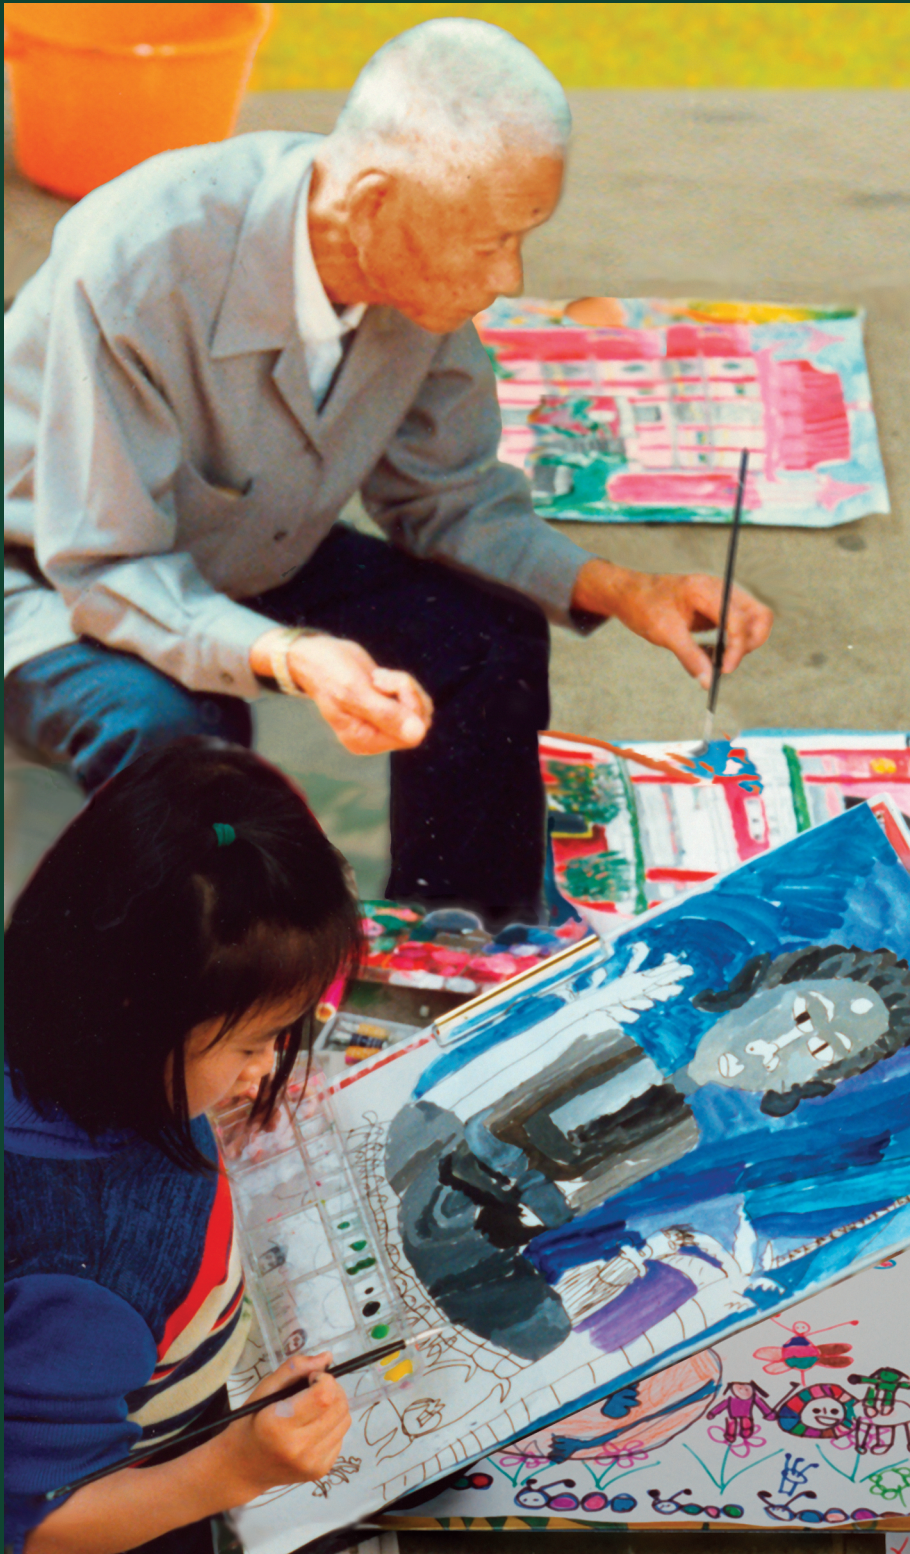

Effectiveness of Clozapine Versus Olanzapine, Quetiapine, and Risperidone in Patients With Chronic Schizophrenia Who Did Not Respond to Prior Atypical Antipsychotic Treatment — A Phase 2 CATIE Study  
Joseph P. McEvoy et al. 600

Effectiveness of Olanzapine, Quetiapine, Risperidone, and Ziprasidone in Patients With Chronic Schizophrenia Following Discontinuation of a Previous Atypical Antipsychotic — A Phase 2 CATIE Study  
T. Scott Stroup et al. 611

Elevated Cerebrospinal Fluid Substance P Concentrations in Posttraumatic Stress Disorder and Major Depression  
Thomas D. Geraciotti, Jr. et al. 637

Natural History of Male Psychological Health, XV: Retirement Satisfaction  
George E. Vaillant et al. 682

April 2006

Volume 163 • Number 4

---

Official Journal of the  
AMERICAN PSYCHIATRIC ASSOCIATION

---

[ajp.psychiatryonline.org](http://ajp.psychiatryonline.org)
