# THE AMERICAN JOURNAL OF PSYCHIATRY

## EDITOR-IN-CHIEF

Robert Freedman, M.D.

## DEPUTY EDITORS

David A. Lewis, M.D.

Robert Michels, M.D.

Daniel S. Pine, M.D.

Susan K. Schultz, M.D.

Carol A. Tamminga, M.D.

## EDITORIAL STAFF

### Editorial Director

Sandra L. Patterson

### Editorial Manager

Michael D. Roy

### Senior Editors

Leannah M. Harding, E.L.S.

Joanne Wagner, E.L.S.

Jane Weaver, E.L.S.

### Production Editor

Julie C. Blair

### Graphic Designer

Jason Glance

### Peer Review Administrator

Molly Douglas

### Editorial Assistant

Astewaye Yigzaw

### Assistants to the Editors

Lois Campbell

Aniko Evans

Rachel Hogg

Russell A. Scholl

## ASSOCIATE EDITORS

Francine M. Benes, M.D., Ph.D.

Wade H. Berrettini, M.D., Ph.D.

David P. Brent, M.D.

Kathleen T. Brady, M.D., Ph.D.

Cameron S. Carter, M.D.

J. Raymond DePaulo, Jr., M.D.

Leon Eisenberg, M.D.

Glen O. Gabbard, M.D.

Howard H. Goldman,  
M.D., Ph.D.

Jeffrey A. Lieberman, M.D.

Robert C. Malenka, M.D., Ph.D.

Maria A. Oquendo, M.D.

Barbara L. Parry, M.D.

Larry J. Siever, M.D.

Myrna M. Weissman, Ph.D.

## EDITORS EMERITI

Nancy C. Andreasen,  
M.D., Ph.D.

John C. Nemiah, M.D.

## FORMER EDITORS

Amariah Brigham, M.D.  
1844-1849

T. Romeyn Beck, M.D.  
1849-1854

John P. Gray, M.D.  
1854-1886

G. Alder Blumer, M.D.  
1886-1894

Richard Dewey, M.D.  
1894-1897

Henry M. Hurd, M.D.  
1897-1904

Edward N. Brush, M.D.  
1904-1931

Clarence B. Farrar, M.D.  
1931-1965

Francis J. Braceland, M.D.  
1965-1978

The American Journal of Psychiatry is online at [ajp.psychiatryonline.org](http://ajp.psychiatryonline.org)

# THE AMERICAN PSYCHIATRIC ASSOCIATION

1000 Wilson Blvd., Suite 1825, Arlington, VA 22209-3901  
(888) 357-7924 (toll-free inside the U.S. and Canada) / (703) 907-7300  
web site: [www.psych.org](http://www.psych.org) / e-mail: [apa@psych.org](mailto:apa@psych.org)

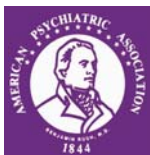

## OFFICERS 2005–2006

|                            |                                   |
|----------------------------|-----------------------------------|
| <b>President</b>           | Steven S. Sharfstein, M.D.        |
| <b>President-Elect</b>     | Pedro Ruiz, M.D.                  |
| <b>Vice-President</b>      | Nada L. Stotland, M.D.,<br>M.P.H. |
| <b>Secretary-Treasurer</b> | Carolyn B. Robinowitz,<br>M.D.    |

## ASSEMBLY

|                      |                            |
|----------------------|----------------------------|
| <b>Speaker</b>       | Joseph Ezra V. Rubin, M.D. |
| <b>Speaker-Elect</b> | Michael Blumenfield, M.D.  |
| <b>Recorder</b>      | Jeffrey Akaka, M.D.        |

## MEDICAL DIRECTOR'S OFFICE

|                                                                               |                                   |
|-------------------------------------------------------------------------------|-----------------------------------|
| <b>Medical Director</b>                                                       | James Scully, M.D.                |
| <b>Chief Executive Officer,<br/>American Psychiatric<br/>Publishing, Inc.</b> | Ronald E. McMillen                |
| <b>Executive Director,<br/>APIRE<br/>Division of Research</b>                 | Darrel A. Regier, M.D.,<br>M.P.H. |

## BOARD OF TRUSTEES

|                                |                                 |
|--------------------------------|---------------------------------|
| Paul S. Appelbaum, M.D.        | James E. Niningger, M.D.        |
| Tanya R. Anderson, M.D.        | Donna M. Norris, M.D.           |
| Renee L. Binder, M.D.          | Roger Peele, M.D.               |
| Thomas K. Ciesla, M.D.         | Michelle B. Riba, M.D., M.S.    |
| Mary Helen Davis, M.D.         | Anne Marie T. Sullivan,<br>M.D. |
| David Fassler, M.D.            | Albert V. Vogel, M.D.           |
| Marcia K. Goin, M.D.,<br>Ph.D. | Sidney H. Weissman, M.D.        |
| Daniel T. Mamah, M.D.          |                                 |

## AMERICAN PSYCHIATRIC PUBLISHING, INC.

### BOARD OF DIRECTORS 2005-2006

|                            |                                         |
|----------------------------|-----------------------------------------|
| <b>President and Chair</b> | Thomas N. Wise, M.D.                    |
| <b>Secretary</b>           | Glen O. Gabbard, M.D.                   |
| <b>Treasurer</b>           | Nada L. Stotland, M.D.,<br>M.P.H.       |
| Francine Cournos, M.D.     | Alan F. Schatzberg, M.D.                |
| John M. Oldham, M.D.       | Donna E. Stewart, M.D.,<br>F.R.C.P.(C.) |
| Laura W. Roberts, M.D.     |                                         |

## EX-OFFICIO MEMBERS

|                                                  |                               |
|--------------------------------------------------|-------------------------------|
| <b>APA President</b>                             | Steven S. Sharfstein, M.D.    |
| <b>APA President Elect</b>                       | Pedro Ruiz, M.D.              |
| <b>APA Secretary-Treasurer</b>                   | Carolyn B. Robinowitz, M.D.   |
| <b>APA Medical Director</b>                      | James Scully, M.D.            |
| <b>Editor-in-Chief,<br/>Psychiatric Services</b> | Howard Goldman, M.D.          |
| <b>Editor-in-Chief, Books</b>                    | Robert E. Hales, M.D., M.B.A. |

The American Journal of Psychiatry is online at [ajp.psychiatryonline.org](http://ajp.psychiatryonline.org)

# THE AMERICAN PSYCHIATRIC ASSOCIATION

## Chairpersons of Councils, Commissions, Committees, and Task Forces

### Standing Committees

#### Audit

Carolyn B. Robinowitz, M.D.

#### Finance and Budget

Jack W. Bonner III, M.D.

#### Bylaws

Derek Puddester, M.D.

#### Elections

Yvonne B. Ferguson, M.D.

#### Ethics

Spencer Eth, M.D.

#### Executive and Officer Compensation

Allan Tasman, M.D.

#### Investment Oversight

Maria T. Lymberis, M.D.

#### Joint Reference

Steven S. Sharfstein, M.D.

#### Membership

Mary K. Marrocco, M.D.

#### Nominating

Marcia K. Goin, M.D., Ph.D.

#### Tellers

Liza Hannah Gold, M.D.

### Council on Addiction Psychiatry

Shelly F. Greenfield, M.D.,  
M.P.H.

#### Training and Education in Addiction Psychiatry

John A. Renner, Jr., M.D.

#### Treatment Services for Patients With Addictive Disorders

Marianne T. Guschwan,  
M.D.

### Council on Advocacy and Public Policy

Jeremy Allan Lazarus, M.D.

#### Committee on Government Relations

Tom Enderby Noyes, M.D.

#### Committee on Public Affairs

Marc David Graff, M.D.

#### Committee on Advocacy and Litigation Funding

Jeffrey Stuart Janofsky, M.D.

### Council on Children, Adolescents, and Their Families

Lois Talbot Flaherty, M.D.

#### Developmental Disabilities

Roxanne Dryden-Edwards,  
M.D.

#### Family Violence and Abuse

Yvonne B. Ferguson, M.D.

#### Blanche F. Ittleson Research Award

Peter S. Jensen, M.D.

#### Juvenile Justice Issues

William Arroyo, M.D.

#### Agnes Purcell McGavin Award

Myron Lowell Belfer, M.D.

#### Infancy and Early Childhood

Irene Chatoor, M.D.

#### Mental Health and Schools

Eugenio M. Rothe, M.D.

### Council on Aging

Joseph A. Cheong, M.D.

#### Access and Effectiveness of Psychiatric Services for the Elderly

Allan A. Anderson, M.D.

#### Ethnic Minority Elderly

Iqbal Ahmed, M.D.

#### Long-Term Care and Treatment for the Elderly

Helen Hisae Kyomen, M.D.

#### Senior Psychiatrists

Hugh Curtis Hendrie, M.D.

### Council on Global Psychiatry

Rodrigo A. Munoz, M.D.

#### Misuse and Abuse of Psychiatry

Elissa P. Benedek, M.D.

#### Psychiatric Dimensions of Disasters

Anthony T. Ng, M.D.

### Council on Healthcare Systems and Financing

Barry F. Chaitin, M.D.

#### APA/Business Relations

Norman A. Clemens, M.D.

#### Managed Care

Lawrence B. Lurie, M.D.

#### Medicare Advisory

Edward Gordon, M.D.

#### Private Practice

#### Psychiatry in the Workplace

Steven E. Pflanz, M.D.

#### Public Funding for Psychiatric Services

Selby C. Jacobs, M.D.

#### Reimbursement for Psychiatric Care

Joseph T. English, M.D.

#### RBRVS, Codes and Reimbursement

Chester W. Schmidt, Jr., M.D.

### Council on Medical Education and Lifelong Learning

Richard Balon, M.D.

#### APA/Bristol-Myers Squibb Fellowship Selection

Tana Annette Grady-Weliky,  
M.D.

#### APA/SAMHSA Minority Fellowship Selection and Advisory

Evaristo O. Akerele, M.D.

#### APA/GlaxoSmithKline Fellowship Selection and Program

Leah Joan Dickstein, M.D.

#### APA/Lilly Products

#### Resident Research Award

Carol C. Nadelson, M.D.

#### CME/Lifelong Learning

David Bruce Mallott, M.D.

#### Commercial Support

David M. McDowell, M.D.

#### History and Library

Avram H. Mack, M.D.

#### Medical Student Education

Carl Bruce Greiner, M.D.

#### Psychiatric Administration and Management

Stuart Beal Silver, M.D.

#### Residents and Fellows

William C. Wood, M.D.

#### Scientific Program

Marian I. Butterfield, M.D.

#### Scientific Program Committee of the Institute on Psychiatric Services

Gloria Pitts, M.D.

#### Vestmark Award

Patricia Isbell Ordorica,  
M.D.

### Council on Member and District Branch Relations

Michael J. Vergare, M.D.

#### Distinguished Service Award

#### Newsletter of the Year

#### District Branch Advisory

#### Physician Health, Illness and Impairment

John Adam Fromson, M.D.

#### Ad Hoc Work Group on Information Systems

Robert C. Hsiung, M.D.

### Council on Minority Health and Health Disparities

Francis G. Lu, M.D.

#### American Indian, Alaska Native and Native Hawaiian Psychiatrists

Frank W. Brown, M.D.

#### Asian-American Psychiatrists

John Luo, M.D.

#### Black Psychiatrists

Michelle O. Clark, M.D.

#### Gay, Lesbian, and Bisexual Issues

Jack Drescher, M.D.

#### Hispanic Psychiatrists

Ana Elisa Campo, M.D.

#### International Medical Graduates

Godehard Oepen, M.D.

#### Religion, Spirituality, and Psychiatry

John Raymond Peteet, M.D.

#### Women

Kathy M. Vincent, M.D.

### Council on Psychiatry And Law

Paul S. Appelbaum, M.D.

#### Confidentiality

Jerome Howard Rogoff,  
M.D.

#### Judicial Action

Jeffrey L. Metzner, M.D.

#### Manfred S. Guttmacher Award

Michael A. Norko, M.D.

#### Isaac Ray Award

Diane H. Schetky, M.D.

### Council on Psychosomatic Medicine

Philip R. Muskin, M.D.

### Council on Quality Care

John M. Oldham, M.D.

#### AIDS

Francine Cournos, M.D.

#### Executive Committee for Practice Guidelines

John S. McIntyre, M.D.

#### Psychotherapy by Psychiatrists

Lisa A. Mellman, M.D.

#### Quality Indicators

G. Richard Smith, Jr., M.D.

#### Standards and Survey Procedures

Steven I. Altchuler, M.D.,  
Ph.D.

#### Steering Committee on Practice Guidelines

John S. McIntyre, M.D.

#### Patient Safety

Alfred Herzog, M.D.

### Council on Research

John Francis Greden, M.D.

#### Electroconvulsive and Other Electromagnetic Therapies

Sarah H. Lisanby, M.D.

#### Health Services Research

Wayne Jay Katon, M.D.

#### Prevention of Mental Disorders and Promotion of Mental Health

William Rigby Beardslee,  
M.D.

David Reiss, M.D. (co-chairs)

#### Psychiatric Diagnosis and Assessment

David J. Kupfer, M.D.

#### Research Awards

Alan F. Schatzberg, M.D.

#### Research on Psychiatric Treatments

Alan Jay Gelenberg, M.D.

#### Research Training

Michele Tortora Pato, M.D.

### Council on Social Issues and Public Psychiatry

Robert Paul Cabaj, M.D.

#### Poverty, Homelessness, and Psychiatric Disorders

Hunter L. McQuiston, M.D.

#### Psychiatric Services Achievement Awards

Cheryl Singleton Al-Mateen,  
M.D.

#### Jails and Prisons

Henry C. Weinstein, M.D.

### Special Components

#### Editorial Advisory Committee

Michael F. Myers, M.D.
