# THE AMERICAN JOURNAL OF PSYCHIATRY

*Official Journal of the American Psychiatric Association*

## Instructions for Activating Your Online Subscription

**As with most electronic periodicals, there are step-by-step instructions that must be followed to enable you to receive your online issue of *The American Journal of Psychiatry*. Please follow the procedures outlined below.**

Make sure you have your customer identification number available. This number is printed on your *Journal* mailing label, directly above your name and address. If you cannot locate this number, please contact American Psychiatric Publishing, Inc., through one of the following methods:

- e-mail: [accessnumber@psych.org](mailto:accessnumber@psych.org)
- phone: (800) 368-5777
- fax: (703) 907-1091
- mail:

American Psychiatric Publishing, Inc.  
1000 Wilson Blvd., Suite 1825  
Arlington, VA 22209-3901  
Attn: Circulation Department.

Internet: <http://www.psychiatryonline.org>. Click on the "Subscriptions" button located near the bottom of the page. Then click on the appropriate link:

- **ACTIVATE Your Member or Individual (Nonmember) Subscription**
- **ACTIVATE Your Institutional Subscription**

Please review the Terms and Conditions of the online subscription before starting the subscription process. Before entering your customer number in the box provided, follow the instructions below.

**For APA Members**, you will find your member number on the mailing label above your name. It is a 10-digit number beginning with zeros. Enter your number in the box and click the SUBMIT button.

**For Individual Nonmembers and Institutions**, your customer number is on the mailing label above your name. It is a 10-digit number beginning with 22 or 30. Enter this number in the box and click the SUBMIT button.

Fill out all the information on the next screen and press the "Send Form" button at the bottom on the right. **DO NOT CLICK** the "Clear Form" button.

### **INSTITUTIONAL SUBSCRIBERS ONLY**

You will then be brought to the screen to enter the IP addresses for your institution. These IP addresses should conform to the Terms and Conditions of your license. Read the "Help with IP Addresses" to see how to enter IP ranges.

When finished, click the "Done" button. You will receive an e-mail confirmation that your subscription has been activated.

The American Journal of Psychiatry is online at [ajp.psychiatryonline.org](http://ajp.psychiatryonline.org)

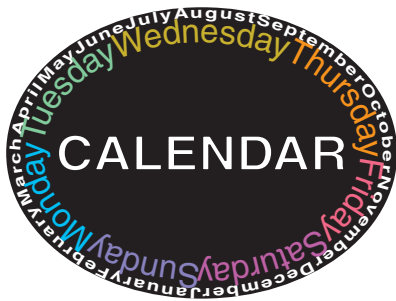

For free listing of your organization's official annual or regional meeting, please send us the following information: sponsor, location, inclusive dates, type and number of continuing education credits (if available), and the name, address, and telephone number of the person or group to contact for more information. In order for an event to appear in our listing, all notices and changes must be received at least 6 months in advance of the meeting and should be addressed to:

Calendar, American Journal of Psychiatry, 1000 Wilson Boulevard, Suite 1825, Arlington, VA 22209-3901, (703) 907-8572 (tel), [jblair@psych.org](mailto:jblair@psych.org) (e-mail).

Because of space limitations, only listings of meetings of the greatest interest to Journal readers will be included.

## APRIL

**April 7–8**, Fifth Annual Pharmacogenetics in Psychiatry Meeting, sponsored by the Zucker Hillside Hospital of the North Shore-Long Island Jewish Health System, New York. Contact: Rae Ann DeRosse, Zucker Hillside Hospital, Dept. of Psychiatry Research, 75-59 263rd St., Glen Oaks, NY 11004; (718) 470-8418 (tel), (718) 343-1659 (fax), [rderosselij.edu](mailto:rderosselij.edu) (e-mail), [www.pharmacogeneticsinpsychiatry.com](http://www.pharmacogeneticsinpsychiatry.com) (web site).

**April 7–8**, Advances in Psychiatry : A Guide to Clinical Practice, New York, NY. Contact: Center for Continuing Medical Education, 630 West 168th St., Unit 39, New York, NY 10032; (212) 305-3334 (tel), (212) 781-6047 (fax), [cme@columbia.edu](mailto:cme@columbia.edu) (e-mail).

## MAY

**May 20–25**, 159th Annual Meeting of the American Psychiatric Association, Toronto, Ontario, Canada. Contact: Cathy Nash, APA Annual Meetings Dept., 1000 Wilson Blvd., Ste. 1825, Arlington, VA 22209; (703) 907-7822.

## JUNE

**June 7–10**, Academy for Eating Disorders International Conference on Eating Disorders, Barcelona, Spain. Contact: AED, 60 Revere Dr, Ste. 500, Northbrook, IL 60062-1577; (847) 498-4274 (tel), (847) 480-9282 (fax), [info@aedweb.org](mailto:info@aedweb.org) (e-mail), [www.aedweb.org](http://www.aedweb.org) (web site).

## SEPTEMBER

**September 9–10**, Stanford Department of Psychiatry and the Association for Research in Personality Disorders (ARPD) will be presenting an educational program entitled "Personality Disorders, Research and Treatment," Stanford, CA. Contact: Pascale Goupillaud Stemmler, Department of Psychiatry and Behavioral

Sciences, Stanford University School of Medicine, 401 Quarry Road, Room 3365, Stanford, California 94305; (650) 725-3193 (tel), (650) 725-3194 (fax), [pascal@stanford.edu](mailto:pascal@stanford.edu) (e-mail).

## OCTOBER

**October 3–6**, International Early Psychosis Association conference: "Beyond the Crossroads," Birmingham, United Kingdom. Contact: Happenings Australia, (+61 3) 9866 6288 (tel), (+61 3) 9866 6313 (fax), [event@happenings.com.au](mailto:event@happenings.com.au) (e-mail), [www.happenings.com.au](http://www.happenings.com.au) (web site).

**October 5–8**, 58th Institute on Psychiatric Services, American Psychiatric Association, New York. Contact: Jill Gruber, APA Annual Meetings Dept., 1000 Wilson Blvd., Ste. 1825, Arlington, VA 22209; (703) 907-7815.

**October 24–29**, 53rd Annual Meeting, American Academy of Child and Adolescent Psychiatry, San Diego. Contact: Anita Wiler, Assistant Director of Meetings, AACAP, 3615 Wisconsin Ave., N.W., Washington, DC 20016-3007; (202) 966-7300 Ext. 101 (tel), (202) 966-5894 (fax), [meetings@aacap.org](mailto:meetings@aacap.org) (e-mail), [www.aacap.org](http://www.aacap.org) (web site).

## FEBRUARY 2007

**February 21–25**, annual meeting of the American College of Psychiatrists, Palm Springs, California. Contact: American College of Psychiatrists, 732 Addison St., Ste. B, Berkeley, CA 94710; (510) 704-8020 (tel), (510) 704-0113 (fax), [Barbara@acpsych.org](mailto:Barbara@acpsych.org) (e-mail).

## MARCH

**March 1–4**, 20th Annual Meeting of the American Association for Geriatric Psychiatry, New Orleans. Contact: AAGP, 7910 Woodmont Ave., Ste. 1050, Bethesda, MD 20814-3004; (301) 654-7850 (tel), (301)

654-4137 (fax), [www.aagpmeeting.org](http://www.aagpmeeting.org) (web site).

## APRIL

**April 18–21**, 28th Annual Meeting and Scientific Sessions of the Society of Behavioral Medicine, Miami Beach. Contact: Society of Behavioral Medicine, 17000 Commerce Parkway, Ste. C, Mount Laurel, NJ 08054; (856) 439-1297 (tel), (856) 439-0525 (fax), [info@sbm.org](mailto:info@sbm.org) (e-mail).

## MAY

**May 19–24**, 160th Annual Meeting of the American Psychiatric Association, San Diego. Contact: Cathy Nash, APA Annual Meetings Dept., 1000 Wilson Blvd., Ste. 1825, Arlington, VA 22209; (703) 907-7822.

## OCTOBER

**October 7–11**, 15th World Congress on Psychiatric Genetics, New York. Contact: Lynn E DeLisi, International Society of Psychiatric Genetics, NYU School of Medicine, 650 First Avenue, 5th Floor Room 543, New York, NY 10016; (212) 263-3420 (tel), (212) 263-3407 (fax).

**October 23–28**, 54th Annual Meeting of the American Academy of Child and Adolescent Psychiatry, Boston. Contact: AACAP, 3615 Wisconsin Avenue, N.W., Washington, DC 20016-3007; (202) 966-7300 (tel), (202) 966-2891 (fax), [meetings@aacap.org](mailto:meetings@aacap.org) (e-mail), [www.aacap.org](http://www.aacap.org) (web site).

## FEBRUARY 2008

**February 15–18**, 21st Annual Meeting of the American Association for Geriatric Psychiatry, Washington, DC. Contact: AAGP, 7910 Woodmont Ave., Ste. 1050, Bethesda, MD 20814-3004; (301) 654-

*Continued on page A34*

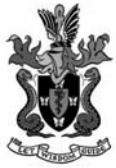

# THE BRITISH JOURNAL OF PSYCHIATRY

FEBRUARY 2006, VOL. 188

<http://bjp.rcpsych.org>

A4 Editorial Board

A5 Highlights of this issue

A6 Psychiatry in pictures

## EDITORIALS

105 **Two-week delay in onset of action of antidepressants: new evidence**  
A.J. Mitchell

107 **The future of cognitive—behavioural therapy for psychosis: not a quasi-neuroleptic**  
M. Birchwood and P. Trower

## REVIEW ARTICLE

109 **Complementary medicines in psychiatry. Review of effectiveness and safety**  
U. Werneke, T. Turner and S. Priebe

## PAPERS

122 **Schizophrenia, neuroleptic medication and mortality**  
M. Joukamaa, M. Heliövaara, P. Knekt, A. Aromaa, R. Raitasalo, and V. Lehtinen

128 **Neuroleptics and mortality: a 50-year cycle. Invited commentary**  
D. Healy

129 **Suicide in mental health in-patients and within 3 months of discharge. National clinical survey**  
J. Meehan, N. Kapur, I.M. Hunt, P. Turnbull, J. Robinson, H. Bickley, R. Parsons, S. Flynn, J. Burns, T. Amos, J. Shaw, and L. Appleby

135 **Suicide within 12 months of mental health service contact in different age and diagnostic groups. National clinical survey**  
I.M. Hunt, N. Kapur, J. Robinson, J. Shaw, S. Flynn, H. Bailey, J. Meehan, H. Bickley, R. Parsons, J. Burns, T. Amos, and L. Appleby

143 **Rates of mental disorder in people convicted of homicide. National clinical survey**  
J. Shaw, I.M. Hunt, S. Flynn, J. Meehan, J. Robinson, H. Bickley, R. Parsons, K. McCann, J. Burns, T. Amos, N. Kapur, and L. Appleby

148 **Cannabis use and mental health in secondary school children. Findings from a Dutch survey**  
K. Monshouwer, S. van Dorsselaer, J. Verdurmen, T. Ter Bogt, R. de Graaf, and W. Vollebergh

154 **Trauma exposure in pre-school children in a war zone**  
A.A.M. Thabet, K. Karim, and P. Vostanis

159 **Psychiatric morbidity among sentenced prisoners: prevalence study in Iran**  
S.M. Assadi, M. Noroozian, M. Pakravannejad, O. Yahyazadeh, S. Aghayan, S.V. Shariat, and S. Fazel

165 **Psychological impact of stillbirth on fathers in the subsequent pregnancy and puerperium**  
P. Turton, W. Badenhorst, P. Hughes, J. Ward, S. Riches, and S. White

173 **Influence of carer expressed emotion and affect on relapse in non-affective psychosis**  
E. Kuipers, P. Bebbington, G. Dunn, D. Fowler, D. Freeman, P. Watson, A. Hardy, and P. Garety

180 **Brain white-matter hyperintensities and treatment outcome in major depressive disorder**  
D.V. Iosifescu, P.F. Renshaw, I.K. Lyoo, H.K. Lee, R.H. Perlis, G.I. Papakostas, A.A. Nierenberg, and M. Fava

## SHORT REPORTS

186 **Intellectual asymmetry and genetic liability in first-degree relatives of probands with schizophrenia**  
E. Kravariti, T. Touloupoulou, F. Mapua-Filbey, K. Schulze, M. Walshe, P. Sham, R.M. Murray, and C. McDonald

188 **Long-term outcome of two forms of randomised benzodiazepine discontinuation**  
R.C. Oude Voshaar, W.J.M.J. Gorgels, A.J.J. Mol, A.J.L.M. van Balkom, J. Mulder, E.H. van de Lisdonk, M.H.M. Breteler, and F.G. Zitman

## COLUMNS

190 Correspondence

194 One hundred years ago

195 Book review

196 Contents of the *American Journal of Psychiatry*

197 Contents of *Advances in Psychiatric Treatment*

198 From the Editor's desk

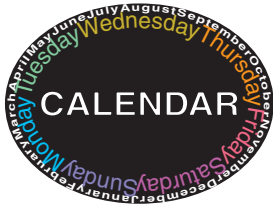

Continued from page A22

7850 (tel), (301) 654-4137 (fax), www.aagpmeeting.org (web site).

## MAY

**May 3–8**, 161st Annual Meeting of the American Psychiatric Association, Washington, DC. Contact: Cathy Nash, APA Annual Meetings Dept., 1000 Wilson Blvd., Ste. 1825, Arlington, VA 22209; (703) 907-7822.

## OCTOBER

**October 28–November 2**, 55th Annual Meeting, American Academy of Child and Adolescent Psychiatry, Chicago. www.aacap.org (web site).

## CONTENTS (Continued from page A5)

### Other Items of Interest

- A22 Calendar
- A30 *The British Journal of Psychiatry* contents (February 2006)
- A42 *Psychological Medicine* contents (February 2006)
- A50 Index to Advertisers

### Cover

Assessment of effective treatment involves analysis of physiological and psychosocial outcomes, both of which are the focus of articles featured in this issue. Psychosocial outcomes, as portrayed in the top image, were studied by Bowie et al. (p.418) who examined adaptive life skills impairment among individuals with schizophrenia and found that an individual's neurocognitive skills were related to work and interpersonal relationships, but the relationship is indirect and mediated by functional capacity. Of course, functional capacity alone may not be enough to overcome barriers to employment for people with schizophrenia, as Rosenheck et al. (p.411) report from data collected for the CATIE study. Physiological outcomes, as portrayed in the bottom image, were studied by Spencer et al. (p.387) who used PET imaging to compare the abuse potential and mechanism of two stimulant formulations. Cover design by Jason Glance.

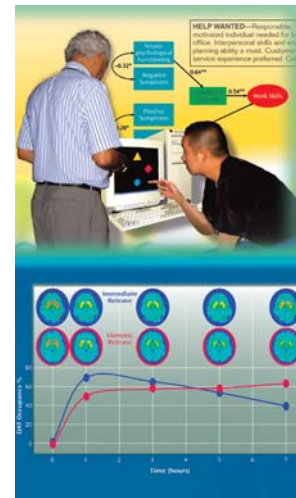

# Coming in the April 2006 issue

## THE AMERICAN JOURNAL OF PSYCHIATRY

### *Effectiveness of Clozapine, Olanzapine, Quetiapine and Risperidone in Patients With Chronic Schizophrenia who Failed Prior Atypical Antipsychotic Treatment*

J.P. McEvoy, J.A. Lieberman, T.S. Stroup, S.M. Davis, R.A. Rosenheck, M.S. Swartz, D.O. Perkins, R.S.E. Keefe, C.E. Davis, J. Severe, J.K. Hsiao, and CATIE Investigators

### *Effectiveness of Olanzapine, Quetiapine, Risperidone, and Ziprasidone in Patients With Chronic Schizophrenia after Discontinuing a Previous Atypical Antipsychotic*

T.S. Stroup, J.A. Lieberman, J.P. McEvoy, M.S. Swartz, S.M. Davis, R.A. Rosenheck, D.O. Perkins, R.S.E. Keefe, C.E. Davis, J. Severe, J.K. Hsiao, and CATIE Investigators

### *Prevalence of Dissociative Disorders in Psychiatric Outpatients*

B. Foote, Y.L. Smolin, M. Kaplan, M.E. Legatt, D. Lipschitz

### *The Prevalence and Correlates of Adult ADHD in the United States: Results From the National Comorbidity Survey Replication*

R.C. Kessler, L. Adler, R. Barkley, J. Biederman, C.K. Conners, O. Demler, S.V. Faraone, L.L. Greenhill, M.J. Howes, K. Secnik, T. Spencer, T.B. Ustun, E.E. Walters, A.M. Zaslavsky

### *Factors Affecting the Diagnosis and Prediction of PTSD Symptomatology in Children and Adolescents*

M.S. Scheeringa, M.J. Wright, J.P. Hunt, C.H. Zeanah

# Psychological Medicine

Volume 36 Number 2 February 2006

## CONTENTS

In this Issue 143

### REVIEW ARTICLES

**The association between suicide and the socio-economic characteristics of geographical areas: a systematic review** REHKOPF, D.H. AND BUKA, S.L. 145

**The age-dependent decline of attention deficit hyperactivity disorder: a meta-analysis of follow-up studies** FARAONE, S.V., BIEDERMAN, J., AND MICK, E. 159

### ORIGINAL ARTICLES

**Young adult outcome of attention deficit hyperactivity disorder: a controlled 10-year follow-up study** BIEDERMAN, J., MONUTEAUX, M.C., MICK, E., SPENCER, T., WILENS, T.E., SILVA, J.M., SNYDER, L.E., AND FARAONE, S.V. 167

**The effect of macroeconomic variables on suicide** BERK, M., DODD, S. AND HENRY, M. 181

**Personality traits as correlates of suicide attempts and suicidal ideation in young adults** BREZO, J., PARIS, J., TREMBLAY, R., VITARO, E., ZOCCOLILLO, M., HÉBERT, M., AND TURECKI, G. 191

**Suicidal behaviour among primary-care patients with depressive disorders** VUORILEHTO, M.S., MELARTIN, T.K., AND ISOMETSÄ, E.T. 203

**No evidence of time trends in the urban-rural differences in schizophrenia risk among five million people born in Denmark from 1910 to 1986** PEDERSEN, C.B. 211

**Event attributes and the content of psychotic experiences in first-episode psychosis** RAUNE, D., BEBBINGTON, P., DUNN, G., AND KUIPERS, E. 221

**Psychotic-like experiences in the general community: the correlates of CIDI psychosis screen items in an Australian sample** SCOTT, J., CHANT, D., ANDREWS, G., AND MCGRATH, J. 231

**Duration of untreated psychosis and ethnicity in the ÆSOP first-onset psychosis study** MORGAN, C., FEARON, P.,

HUTCHINSON, G., MCKENZIE, K., LAPPIN, J.M., ABDUL-AL, R., MORGAN, K., DAZZAN, P., BOYDELL, J., HARRISON, G., CRAIG, T., LEFF, J., JONES, P., AND MURRAY, R., ON BEHALF OF THE ÆSOP STUDY GROUP 239

**Ethno-psychometric evaluation of the General Health Questionnaire in rural China** LEE, D.T.S., YIP, W.C.M., CHEN, Y., MENG, Q., AND KLEINMAN, A. 249

**Twelve-month prevalence, severity, and unmet need for treatment of mental disorders in metropolitan China** SHEN, Y.-C., ZHANG, M.-Y., HUANG, Y.-Q., HE, Y.-L., LIU, Z.-R., CHENG, H., TSANG, A., LEE, S., AND KESSLER, R.C. 257

**Psychiatric morbidity is related to parental age: a national cohort study** EKÉUS, C., OLAUSSON, P.O., AND HJERN, A. 269

### BOOK REVIEWS

*A Historical Dictionary of Psychiatry* JABLENSKY, A. 277

*Treating and Preventing Adolescent Mental Health Disorder* SOOD, B. 278

*Reducing the Stigma of Mental Illness* BYRNE, P. 279

Books Received 281

*American Journal of Psychiatry* Contents October 2005 283
